# Supplementary material
Source: Springer Nature journal article supplement (https://www.springermedizin.de/resource/supplementary/12933_2005_38_MOESM4_ESM.pdf/9539486)

## Vascular ossification - calcification

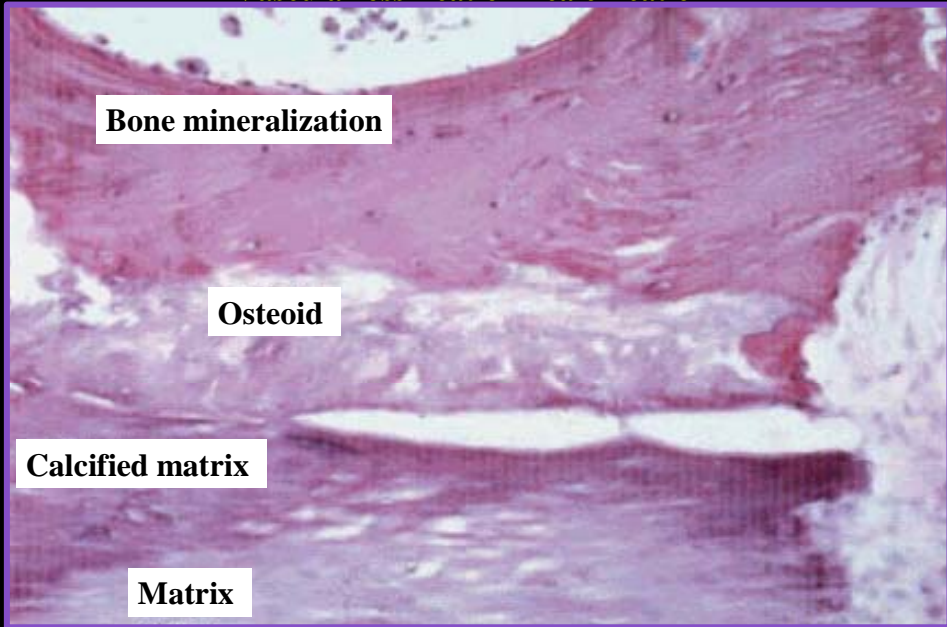

Supplement: MOESM4 [file 9539486]
